# Supplementary material for: Follicle-stimulating hormone induces depression-like phenotype by affecting synaptic function
Source: PubMed Central journal article supplement (PMC11532131; doi:10.3389/fnmol.2024.1459858), 2024-10-21
Supplement: Data_Sheet_1.pdf [file Data_Sheet_1.pdf]

## Supplementary materials for

# Follicle-Stimulating Hormone Induces Depression-Like Phenotype by Affecting Synaptic Function

Liqin Huang, Shangqi Sun, Gege Jiang, Guanfeng Xie, Yunying Yang, Sichun Chen, Jiaying

Luo, Chen Lv, Xiang Li, Jianming Liao, Zhihao Wang, Zhaohui Zhang, Jing Xiong

### Supplementary figures

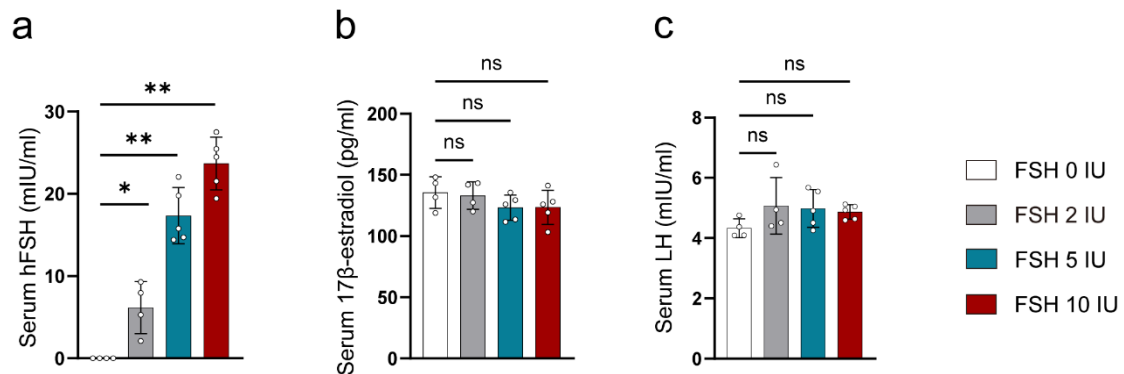

**Supplementary Figure 1 Proper dose of recombinant human FSH don't interfere the serum level of 17β-estradiol and LH in mice.**

(a) ELISA quantification showing that human FSH levels in the serum of mice after recombinant human FSH treatment. (b, c) ELISA quantification shows that the 17β-estradiol (b) and LH (c) levels in the serum of mice after recombinant human FSH treatment. Data are shown as mean ± SEM, n = 4-5 mice per group. Statistical analysis was performed by one-way ANOVA followed by Tukey's multiple comparisons test. \* $P < 0.05$ , \*\* $P < 0.01$ ; ns, not significant.

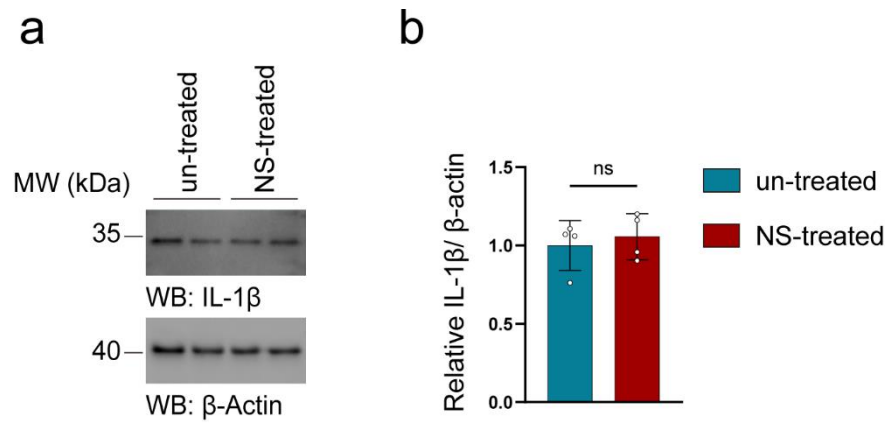

**Supplementary Figure 2 Intraperitoneal injection of NS did not increase the level of neuroinflammation in mice.**

(a-b) Representative immunoblots images (a) and quantification (b) of IL-1 $\beta$  protein expression in the hippocampus, data are presented as mean  $\pm$  SEM, n = 4 mice per group. Statistical analysis was performed by unpaired two-tailed Student's t-test, ns, not significant.

**Supplementary Table 1**

|          | protein       | 0IU  |          | 5IU    |            | 10IU   |            |
|----------|---------------|------|----------|--------|------------|--------|------------|
|          |               | Fold | <i>P</i> | Fold   | <i>P</i> * | Fold   | <i>P</i> # |
| Fig. 2b  | IL-1B         | 1    |          | 1.682  | 0.0017     | 2.38   | <0.0001    |
|          | IL-6          | 1    |          | 1.872  | 0.0522     | 2.515  | 0.0021     |
| Fig. 3b  | PSD95         | 1    |          | 0.8011 | 0.0412     | 0.5512 | 0.0002     |
|          | Synapsin      | 1    |          | 0.8165 | 0.0065     | 0.4398 | <0.0001    |
|          | Synaptophysin | 1    |          | 0.9238 | 0.5937     | 0.6919 | 0.0073     |
| Fig. 4b  | GluR1         | 1    |          | 0.7092 | 0.0113     | 0.4515 | 0.0001     |
|          | GluR2         | 1    |          | 1.143  | 0.0551     | 1.164  | 0.4272     |
|          | VGlut1        | 1    |          | 0.8979 | 0.6021     | 0.5831 | 0.0027     |
|          | GAD67         | 1    |          | 0.7193 | 0.0207     | 0.3507 | <0.0001    |
| Fig. 10b | p-ERK         | 1    |          | 1.198  | 0.1163     | 1.301  | 0.016      |

**Supplementary Table 1**

The folding changes and P-values of significantly altered protein (*P*\*, 0 IU group vs. 5 IU group; *P*#, 0 IU group vs.10 IU group).

**Supplementary Table 2**

|          | protein       | sh-Con+NS |          | sh-Con+FSH |            | sh-FSHR+FSH |            |
|----------|---------------|-----------|----------|------------|------------|-------------|------------|
|          |               | Fold      | <i>P</i> | Fold       | <i>P</i> * | Fold        | <i>P</i> # |
| Fig. 5d  | FSHR          | 1         |          | 0.3857     | 0.0131     |             |            |
| Fig. 7b  | IL-1 $\beta$  | 1         |          | 2.809      | <0.0001    | 1.731       | 0.0004     |
|          | IL-6          | 1         |          | 2.078      | 0.0006     | 1.332       | 0.0066     |
| Fig. 8b  | PSD95         | 1         |          | 0.5393     | 0.0002     | 0.9092      | 0.0008     |
|          | Synapsin      | 1         |          | 0.3915     | <0.0001    | 0.7955      | 0.0018     |
|          | Synaptophysin | 1         |          | 0.6794     | 0.0112     | 0.9203      | 0.0454     |
| Fig. 9b  | GluR1         | 1         |          | 0.6374     | 0.0003     | 0.8394      | 0.0124     |
|          | GluR2         | 1         |          | 0.9846     | 0.01543    | 0.9181      | 0.06648    |
|          | VGlut1        | 1         |          | 0.7038     | 0.0041     | 0.8926      | 0.0464     |
|          | GAD67         | 1         |          | 0.5766     | 0.0004     | 0.9735      | 0.0007     |
| Fig. 10d | p-ERK         | 1         |          | 1.241      | 0.0006     | 1.1         | 0.017      |

**Supplementary Table 2**

The folding changes and P-values of significantly altered protein (*P*\*, sh-Control + NS group vs. sh-Control + FSH group; *P*#, sh-Control + NS group vs. sh-FSHR + FSH group).

**Supplementary Table 3**

|          | protein      | Vehicle |          | FSH   |            | inhibitor |            | FSH+inhibitor |             |
|----------|--------------|---------|----------|-------|------------|-----------|------------|---------------|-------------|
|          |              | Fold    | <i>P</i> | Fold  | <i>P</i> * | Fold      | <i>P</i> # | Fold          | <i>P</i> ## |
| Fig. 10f | P-ERK        | 1       |          | 1.723 | 0.0083     | 0.8461    | 0.7729     | 1.211         | 0.5772      |
|          | IL-1 $\beta$ | 1       |          | 3.232 | 0.0004     | 1.288     | 0.9298     | 2.2           | 0.0214      |
|          | IL-6         | 1       |          | 3.058 | 0.0007     | 1.37      | 0.6413     | 2.025         | 0.0416      |

**Supplementary Table 3**

The folding changes and P-values of significantly altered protein (*P*\*, vehicle group vs. FSH group; *P*#, vehicle group vs. ERK inhibitor group; *P*##, vehicle group vs. FSH + ERK inhibitor group).
